# Supplementary material for: CD96 Downregulation Promotes the Immune Response of CD4 T Cells and Associates with Ankylosing Spondylitis
Source: Hindawi journal article supplement (doi:10.1155/2022/3946754), 2022-01-01
Supplement: f1 [file 3946754.f1.pdf]

| gene     | logFC     | AveExpr   | t         | P. Value | adj. P. Val | B         |
|----------|-----------|-----------|-----------|----------|-------------|-----------|
| ACTG1    | -0.322623 | 13.101459 | -6.960438 | 3.03E-10 | 1.57E-06    | 12.909921 |
| IL2RB    | -0.5855   | 10.187548 | -6.316045 | 6.58E-09 | 1.71E-05    | 10.04788  |
| CD81     | -0.397247 | 11.780627 | -6.228428 | 9.90E-09 | 1.71E-05    | 9.6672773 |
| TAB2     | 0.2054918 | 7.4402644 | 6.0988542 | 1.81E-08 | 2.34E-05    | 9.1086468 |
| RBM47    | 0.3984527 | 8.6391003 | 5.9155894 | 4.19E-08 | 4.34E-05    | 8.3276276 |
| RPL3     | -0.331369 | 10.93164  | -5.644732 | 1.42E-07 | 0.0001226   | 7.1943277 |
| GZMM     | -0.385523 | 8.071595  | -5.559814 | 2.07E-07 | 0.000147    | 6.8445348 |
| ZDHHC18  | 0.4112692 | 9.9846702 | 5.5381097 | 2.28E-07 | 0.000147    | 6.7555721 |
| JMJD8    | -0.256721 | 10.045747 | -5.512343 | 2.55E-07 | 0.000147    | 6.6501927 |
| PKN2     | 0.2705285 | 8.4208108 | 5.4834333 | 2.90E-07 | 0.0001502   | 6.5322723 |
| CD247    | -0.400824 | 11.7512   | -5.335363 | 5.53E-07 | 0.0002548   | 5.9335312 |
| EXOSC10  | -0.240297 | 9.0780313 | -5.320473 | 5.90E-07 | 0.0002548   | 5.8738173 |
| TP53INP1 | 0.3109598 | 9.5586046 | 5.2397672 | 8.35E-07 | 0.0003205   | 5.5517771 |
| ASMTL    | -0.189178 | 8.1138495 | -5.231431 | 8.65E-07 | 0.0003205   | 5.518669  |
| STAT5B   | 0.2546816 | 9.2230485 | 5.1335446 | 1.31E-06 | 0.0004197   | 5.1321714 |
| LCOR     | 0.1956147 | 8.4932744 | 5.1282961 | 1.34E-06 | 0.0004197   | 5.1115665 |
| EI24     | -0.170268 | 8.126197  | -5.122699 | 1.38E-06 | 0.0004197   | 5.0896075 |
| BLOC1S4  | -0.163366 | 8.3164071 | -5.036998 | 1.98E-06 | 0.0005673   | 4.7551112 |
| RASSF5   | -0.14978  | 9.5335478 | -5.011141 | 2.20E-06 | 0.0005673   | 4.6548415 |
| OSBP     | -0.174493 | 9.2452166 | -5.01095  | 2.20E-06 | 0.0005673   | 4.6541028 |
| ADRB2    | -0.29953  | 8.9202159 | -4.995507 | 2.35E-06 | 0.0005673   | 4.5943658 |
| SLU7     | 0.2482754 | 8.6119023 | 4.9899528 | 2.41E-06 | 0.0005673   | 4.5729073 |
| EWSR1    | -0.162404 | 9.1464978 | -4.94348  | 2.92E-06 | 0.0006587   | 4.3939243 |
| FAM43A   | -0.207352 | 8.045673  | -4.884478 | 3.73E-06 | 0.0008062   | 4.1681473 |
| SLC9A3R1 | -0.266561 | 10.14247  | -4.867141 | 4.01E-06 | 0.0008205   | 4.1021193 |
| SLA      | 0.2772993 | 10.990686 | 4.860831  | 4.11E-06 | 0.0008205   | 4.078123  |
| PDZD8    | 0.1991568 | 7.5760891 | 4.8134265 | 5.00E-06 | 0.0009532   | 3.8984654 |
| TINF2    | -0.227354 | 10.095405 | -4.806313 | 5.15E-06 | 0.0009532   | 3.8715997 |
| CMTM7    | -0.202877 | 11.24995  | -4.788475 | 5.54E-06 | 0.0009723   | 3.8043409 |
| PLEKHF1  | -0.324427 | 8.643154  | -4.78459  | 5.62E-06 | 0.0009723   | 3.7897124 |
| AKR1B1   | -0.241254 | 9.5941643 | -4.757287 | 6.29E-06 | 0.0010517   | 3.687119  |
| QRICH1   | -0.1883   | 9.2363382 | -4.727806 | 7.09E-06 | 0.0011486   | 3.5767571 |
| LRRC41   | -0.167786 | 7.5156317 | -4.719255 | 7.34E-06 | 0.0011531   | 3.5448266 |
| DUSP14   | -0.132285 | 7.208672  | -4.705955 | 7.74E-06 | 0.0011811   | 3.4952362 |
| C16orf58 | -0.235931 | 8.9547605 | -4.69064  | 8.24E-06 | 0.0012206   | 3.4382391 |
| SLC3A2   | -0.149287 | 7.7255347 | -4.663171 | 9.20E-06 | 0.0013257   | 3.3363118 |
| ZNF281   | 0.261402  | 9.5534243 | 4.6406288 | 1.01E-05 | 0.0014121   | 3.2529535 |
| FEM1C    | 0.2341908 | 8.4602148 | 4.6211475 | 1.09E-05 | 0.0014361   | 3.1811222 |
| PSMC1    | -0.146474 | 10.490063 | -4.617474 | 1.11E-05 | 0.0014361   | 3.1675991 |
| LBH      | -0.247879 | 8.9288239 | -4.61697  | 1.11E-05 | 0.0014361   | 3.1657435 |
| SUMO2    | -0.269085 | 9.8446469 | -4.600524 | 1.18E-05 | 0.0014963   | 3.1052916 |
| ATP6V1C1 | 0.175993  | 7.9155848 | 4.5931433 | 1.22E-05 | 0.0015043   | 3.0782072 |
| CLK4     | 0.2260183 | 7.8431303 | 4.5757299 | 1.31E-05 | 0.0015653   | 3.0144175 |
| ALKBH5   | -0.176181 | 11.282125 | -4.571485 | 1.33E-05 | 0.0015653   | 2.9988908 |
| MED13L   | 0.1790051 | 7.3542882 | 4.5577267 | 1.40E-05 | 0.0016069   | 2.9486335 |
| DEXI     | -0.184205 | 8.7094774 | -4.550787 | 1.44E-05 | 0.0016069   | 2.9233201 |
| CDC37    | -0.212836 | 11.624295 | -4.54173  | 1.49E-05 | 0.0016069   | 2.8903226 |
| AIMP2    | -0.153937 | 8.6302341 | -4.54164  | 1.50E-05 | 0.0016069   | 2.8899958 |
| SKA2     | 0.1037428 | 6.9310823 | 4.537774  | 1.52E-05 | 0.0016069   | 2.8759238 |
| SQSTM1   | -0.232449 | 10.825283 | -4.530221 | 1.56E-05 | 0.0016225   | 2.8484559 |

|         |           |           |           |          |           |           |
|---------|-----------|-----------|-----------|----------|-----------|-----------|
| EID2    | -0.155511 | 7.2513897 | -4.510417 | 1.69E-05 | 0.0017199 | 2.7765732 |
| ZNF329  | -0.13648  | 7.7668634 | -4.505537 | 1.72E-05 | 0.0017199 | 2.7588931 |
| TMEM35B | -0.201094 | 9.4350318 | -4.500499 | 1.76E-05 | 0.0017213 | 2.7406502 |
| MAPK7   | -0.15033  | 7.5050624 | -4.489291 | 1.84E-05 | 0.0017657 | 2.7001223 |
| SBDSP1  | -0.082654 | 6.9353111 | -4.4644   | 2.03E-05 | 0.0018808 | 2.6103511 |
| SNU13   | -0.173349 | 8.9192283 | -4.455644 | 2.10E-05 | 0.0018808 | 2.5788489 |
| CPSF4   | -0.155606 | 9.3113702 | -4.455478 | 2.10E-05 | 0.0018808 | 2.5782543 |
| DCP2    | 0.2684234 | 10.103867 | 4.455006  | 2.10E-05 | 0.0018808 | 2.576557  |
| SBK1    | -0.229326 | 8.175858  | -4.445955 | 2.18E-05 | 0.0018898 | 2.5440433 |
| GALT    | -0.157146 | 7.9358975 | -4.445124 | 2.19E-05 | 0.0018898 | 2.5410593 |
| ZNF207  | -0.152202 | 9.1217316 | -4.440538 | 2.23E-05 | 0.0018925 | 2.5246035 |
| LRRRC47 | -0.140406 | 8.297642  | -4.413186 | 2.48E-05 | 0.0020717 | 2.4266926 |
| CS      | -0.182628 | 10.190726 | -4.406274 | 2.54E-05 | 0.0020944 | 2.402014  |
| ADGRG5  | -0.249649 | 8.1090813 | -4.394517 | 2.66E-05 | 0.0021581 | 2.3600985 |
| ALG8    | -0.130158 | 8.1803509 | -4.384076 | 2.77E-05 | 0.0022128 | 2.3229356 |
| KCTD5   | -0.152738 | 8.8450853 | -4.37881  | 2.83E-05 | 0.0022242 | 2.3042164 |
| ATIC    | -0.23975  | 9.636209  | -4.360629 | 3.04E-05 | 0.0023337 | 2.2396996 |
| TMEM41A | -0.097972 | 7.2356448 | -4.358687 | 3.06E-05 | 0.0023337 | 2.2328196 |
| NOP56   | -0.221653 | 9.1462804 | -4.348092 | 3.19E-05 | 0.0023711 | 2.1953174 |
| VCPIP1  | 0.250706  | 8.329586  | 4.3470651 | 3.20E-05 | 0.0023711 | 2.1916872 |
| HCST    | -0.254092 | 12.504618 | -4.327237 | 3.45E-05 | 0.0025234 | 2.1216835 |
| PICALM  | 0.2724997 | 10.896712 | 4.3083596 | 3.71E-05 | 0.0026591 | 2.0552406 |
| COP1    | 0.198008  | 10.503046 | 4.306376  | 3.74E-05 | 0.0026591 | 2.0482703 |
| DCTN2   | -0.122285 | 10.166697 | -4.257057 | 4.52E-05 | 0.0031676 | 1.8756784 |
| TBC1D19 | -0.074432 | 6.8619913 | -4.247593 | 4.69E-05 | 0.0032401 | 1.8427158 |
| PAFAH2  | -0.160987 | 8.1171317 | -4.238265 | 4.85E-05 | 0.0033011 | 1.8102747 |
| AARS    | -0.259904 | 9.3713102 | -4.235759 | 4.90E-05 | 0.0033011 | 1.8015689 |
| KLRG1   | -0.438985 | 9.7645556 | -4.219433 | 5.21E-05 | 0.0034277 | 1.7449342 |
| ACSL1   | 0.440342  | 10.755203 | 4.218673  | 5.23E-05 | 0.0034277 | 1.7423029 |
| NT5C2   | 0.207704  | 10.245414 | 4.2157603 | 5.29E-05 | 0.0034277 | 1.7322163 |
| PRPF4   | -0.11557  | 8.6132743 | -4.206397 | 5.48E-05 | 0.0035075 | 1.6998233 |
| HLA-DRA | -0.240847 | 13.143962 | -4.202249 | 5.56E-05 | 0.0035195 | 1.6854918 |
| HBP1    | 0.1665334 | 9.4097287 | 4.1837884 | 5.97E-05 | 0.003728  | 1.6218183 |
| LUZP1   | -0.150471 | 7.8786803 | -4.17758  | 6.11E-05 | 0.0037344 | 1.6004474 |
| NONO    | -0.133236 | 9.0626908 | -4.175486 | 6.16E-05 | 0.0037344 | 1.5932464 |
| PPP2R2B | -0.306417 | 8.2359636 | -4.171211 | 6.26E-05 | 0.0037344 | 1.5785503 |
| RXYLT1  | -0.13513  | 8.1777172 | -4.165988 | 6.38E-05 | 0.0037344 | 1.5606087 |
| CCT3    | -0.178134 | 8.783743  | -4.163035 | 6.45E-05 | 0.0037344 | 1.5504712 |
| HDHD5   | -0.158261 | 8.6747969 | -4.162804 | 6.46E-05 | 0.0037344 | 1.5496809 |
| PROS1   | 0.3501196 | 7.5756388 | 4.1561716 | 6.62E-05 | 0.0037344 | 1.5269321 |
| RHOC    | -0.243134 | 9.3385901 | -4.15601  | 6.62E-05 | 0.0037344 | 1.5263773 |
| ACSL4   | 0.3106725 | 8.9319857 | 4.1559237 | 6.63E-05 | 0.0037344 | 1.5260825 |
| WDR1    | -0.184582 | 10.079469 | -4.147166 | 6.85E-05 | 0.0037344 | 1.4960868 |
| TMEM138 | -0.11909  | 7.8823457 | -4.146428 | 6.87E-05 | 0.0037344 | 1.4935598 |
| MAP4K1  | -0.267524 | 9.7595347 | -4.145479 | 6.89E-05 | 0.0037344 | 1.490314  |
| PYGL    | 0.3610466 | 10.514456 | 4.1411704 | 7.00E-05 | 0.0037344 | 1.4755764 |
| KCNJ15  | 0.4018793 | 8.6191032 | 4.1385775 | 7.07E-05 | 0.0037344 | 1.4667131 |
| PHF21A  | 0.2280901 | 10.56462  | 4.1341353 | 7.19E-05 | 0.0037344 | 1.4515371 |
| PVRIG   | -0.267339 | 9.2377093 | -4.13405  | 7.19E-05 | 0.0037344 | 1.4512472 |
| NELFCD  | -0.17356  | 8.9447999 | -4.131705 | 7.26E-05 | 0.0037344 | 1.4432384 |
| HNRNPK  | -0.277729 | 9.8093592 | -4.131053 | 7.27E-05 | 0.0037344 | 1.4410147 |

|          |           |           |           |           |           |           |
|----------|-----------|-----------|-----------|-----------|-----------|-----------|
| E2F3     | 0.2556374 | 9.141965  | 4.1174833 | 7.65E-05  | 0.0038901 | 1.3947518 |
| HNMT     | 0.2024908 | 7.3788637 | 4.1136582 | 7.76E-05  | 0.0039077 | 1.3817308 |
| SPOCK2   | -0.317509 | 11.404793 | -4.108655 | 7.91E-05  | 0.0039405 | 1.3647122 |
| UTP14A   | -0.115971 | 7.9220482 | -4.106256 | 7.98E-05  | 0.0039405 | 1.3565571 |
| FBLN5    | -0.192031 | 7.4474362 | -4.09114  | 8.44E-05  | 0.0041292 | 1.3052503 |
| SEC22C   | -0.127433 | 7.8448401 | -4.087657 | 8.55E-05  | 0.0041439 | 1.2934481 |
| SNAPC2   | -0.107393 | 7.8527601 | -4.081346 | 8.75E-05  | 0.0041718 | 1.27208   |
| IFRD1    | 0.2945627 | 8.5150672 | 4.0808575 | 8.77E-05  | 0.0041718 | 1.2704258 |
| PTGER2   | -0.220945 | 8.6221978 | -4.066449 | 9.25E-05  | 0.0043607 | 1.2217348 |
| YPEL5    | 0.2554635 | 10.404301 | 4.0569531 | 9.58E-05  | 0.0044238 | 1.1897101 |
| NSMF     | -0.180147 | 7.6439499 | -4.056696 | 9.59E-05  | 0.0044238 | 1.1888441 |
| ARHGEF18 | -0.201502 | 11.200205 | -4.055006 | 9.65E-05  | 0.0044238 | 1.1831504 |
| CNOT11   | -0.158465 | 9.7342137 | -4.051285 | 9.78E-05  | 0.0044238 | 1.1706194 |
| USP15    | 0.2529457 | 8.331074  | 4.0505431 | 9.81E-05  | 0.0044238 | 1.1681237 |
| GNAT3    | 0.219341  | 8.4861002 | 4.0466002 | 9.95E-05  | 0.004427  | 1.1548577 |
| RNPS1    | -0.146363 | 9.1991586 | -4.045354 | 1.00E-04  | 0.004427  | 1.1506654 |
| TAPT1    | 0.1348803 | 7.5599531 | 4.0433667 | 0.0001007 | 0.004427  | 1.1439853 |
| SNIP1    | -0.126046 | 7.7140993 | -4.032291 | 0.0001049 | 0.0045727 | 1.1067918 |
| KIAA2026 | -0.121525 | 7.4148429 | -4.025131 | 0.0001077 | 0.0046245 | 1.082788  |
| GZMK     | -0.462137 | 9.8474629 | -4.021881 | 0.000109  | 0.0046245 | 1.0719011 |
| SH2D1B   | -0.319564 | 7.8484536 | -4.020968 | 0.0001094 | 0.0046245 | 1.0688438 |
| UGP2     | 0.1596133 | 8.7534878 | 4.0177133 | 0.0001107 | 0.0046245 | 1.05795   |
| SAMM50   | -0.201465 | 9.0324027 | -4.017108 | 0.000111  | 0.0046245 | 1.0559248 |
| RALGDS   | -0.267502 | 10.081132 | -4.015859 | 0.0001115 | 0.0046245 | 1.0517459 |
| CXCR6    | -0.175032 | 7.1661239 | -4.010628 | 0.0001136 | 0.0046767 | 1.0342557 |
| AK5      | -0.098344 | 6.8475424 | -4.004439 | 0.0001162 | 0.0047464 | 1.0135865 |
| GNLY     | -0.589745 | 11.533635 | -3.982245 | 0.0001261 | 0.0050921 | 0.9396481 |
| OGFOD1   | -0.121388 | 8.2624439 | -3.980958 | 0.0001267 | 0.0050921 | 0.9353698 |
| TOMM40   | -0.172521 | 8.8670588 | -3.958051 | 0.0001377 | 0.0054931 | 0.8593883 |
| CCDC89   | 0.0983903 | 7.1695088 | 3.9537092 | 0.0001399 | 0.0055122 | 0.8450225 |
| ABLIM3   | 0.1795795 | 7.146592  | 3.9528991 | 0.0001403 | 0.0055122 | 0.8423433 |
| DNAJC8   | -0.182823 | 10.50084  | -3.939568 | 0.0001473 | 0.0057195 | 0.7983129 |
| TGS1     | -0.099907 | 6.9646848 | -3.936982 | 0.0001487 | 0.0057195 | 0.7897837 |
| NUDT9    | -0.12414  | 7.6493973 | -3.936543 | 0.0001489 | 0.0057195 | 0.7883384 |
| NUMB     | 0.251175  | 10.494969 | 3.9316381 | 0.0001516 | 0.0057793 | 0.7721736 |
| HOMER2   | 0.1583224 | 7.1110281 | 3.9269054 | 0.0001542 | 0.0058364 | 0.7565914 |
| ZBTB34   | 0.2216133 | 8.7106658 | 3.9210974 | 0.0001575 | 0.0059171 | 0.7374879 |
| CYB5R4   | 0.2653391 | 9.2645826 | 3.9101916 | 0.0001638 | 0.0061107 | 0.7016722 |
| JAK2     | 0.2132132 | 7.7514637 | 3.9016431 | 0.0001689 | 0.0062289 | 0.6736495 |
| GPR89B   | -0.134924 | 7.2887604 | -3.899618 | 0.0001702 | 0.0062289 | 0.6670176 |
| ACTR1B   | -0.101317 | 8.3776747 | -3.898961 | 0.0001706 | 0.0062289 | 0.6648653 |
| DNAJA3   | -0.15431  | 8.9563926 | -3.893378 | 0.000174  | 0.006311  | 0.6465976 |
| MIS18A   | -0.094652 | 6.9868366 | -3.889002 | 0.0001768 | 0.0063667 | 0.6322942 |
| EXOC6    | 0.1930712 | 8.0325195 | 3.8775504 | 0.0001842 | 0.0065885 | 0.5949141 |
| CFL1     | -0.151612 | 11.998599 | -3.871344 | 0.0001884 | 0.0066628 | 0.57469   |
| CENPB    | -0.194345 | 9.5922265 | -3.87061  | 0.0001889 | 0.0066628 | 0.572301  |
| ZNF263   | -0.111515 | 8.1527764 | -3.865696 | 0.0001922 | 0.0067354 | 0.5563069 |
| SYNJ1    | 0.1517531 | 8.1390591 | 3.8574465 | 0.000198  | 0.0068908 | 0.5294897 |
| KCMF1    | 0.1065688 | 7.0706445 | 3.8517286 | 0.0002021 | 0.0069462 | 0.5109275 |
| AKR7A2   | -0.155311 | 9.5860104 | -3.851481 | 0.0002023 | 0.0069462 | 0.510126  |
| PLEKHA1  | -0.27343  | 9.5789938 | -3.846568 | 0.0002058 | 0.0070228 | 0.4941928 |

|         |           |           |           |           |           |           |
|---------|-----------|-----------|-----------|-----------|-----------|-----------|
| PTPN1   | -0.174711 | 9.5478852 | -3.840293 | 0.0002105 | 0.0071256 | 0.473866  |
| CD96    | -0.25082  | 9.3412597 | -3.838836 | 0.0002116 | 0.0071256 | 0.4691492 |
| TNNC2   | 0.1581036 | 7.0337833 | 3.8363824 | 0.0002135 | 0.0071333 | 0.4612105 |
| LPIN1   | -0.215309 | 9.1168189 | -3.834915 | 0.0002146 | 0.0071333 | 0.4564633 |
| RPL7L1  | -0.156515 | 10.79284  | -3.827342 | 0.0002204 | 0.0072817 | 0.4319913 |
| CHD7    | 0.1476366 | 7.9975286 | 3.8038934 | 0.0002396 | 0.0078644 | 0.3564428 |
| NKG7    | -0.467017 | 11.897227 | -3.797812 | 0.0002448 | 0.0079375 | 0.3369049 |
| CDK4    | -0.134477 | 8.6805446 | -3.796235 | 0.0002462 | 0.0079375 | 0.3318443 |
| MIPEP   | -0.080188 | 7.0411131 | -3.795978 | 0.0002464 | 0.0079375 | 0.3310178 |
| FKBP1A  | 0.2540053 | 10.51599  | 3.7929256 | 0.0002491 | 0.0079519 | 0.3212248 |
| NUCKS1  | -0.185988 | 8.5567296 | -3.790368 | 0.0002514 | 0.0079519 | 0.3130229 |
| GALK2   | -0.108296 | 7.8225343 | -3.790249 | 0.0002515 | 0.0079519 | 0.3126417 |
| TMEM69  | -0.104784 | 8.0504224 | -3.784993 | 0.0002562 | 0.008052  | 0.2958004 |
| REXO4   | -0.158758 | 7.7887342 | -3.776728 | 0.0002638 | 0.0082329 | 0.2693527 |
| PSMB10  | -0.164839 | 12.163025 | -3.775292 | 0.0002651 | 0.0082329 | 0.2647612 |
| CIR1    | 0.1662914 | 8.7151289 | 3.7732514 | 0.000267  | 0.0082431 | 0.2582406 |
| RUNX2   | 0.1375834 | 7.4656461 | 3.7677941 | 0.0002722 | 0.0083535 | 0.2408135 |
| NUBP1   | -0.100128 | 7.8522208 | -3.759886 | 0.0002799 | 0.0084975 | 0.215595  |
| DOLPP1  | -0.084972 | 7.2706176 | -3.759602 | 0.0002802 | 0.0084975 | 0.2146902 |
| PSMA1   | -0.139258 | 10.121717 | -3.756517 | 0.0002833 | 0.0085403 | 0.20486   |
| MRRF    | -0.091136 | 7.7797166 | -3.750956 | 0.0002888 | 0.0086507 | 0.1871616 |
| EIF3G   | -0.196913 | 10.818945 | -3.74918  | 0.0002907 | 0.0086507 | 0.1815138 |
| NFAT5   | -0.218133 | 7.5746281 | -3.747945 | 0.0002919 | 0.0086507 | 0.1775872 |
| ACSL5   | -0.154632 | 9.1222348 | -3.746321 | 0.0002936 | 0.0086507 | 0.1724272 |
| PUS1    | -0.18229  | 8.8324146 | -3.737861 | 0.0003024 | 0.008861  | 0.145562  |
| GSTP1   | -0.171596 | 10.936238 | -3.734789 | 0.0003057 | 0.0089066 | 0.1358203 |
| UBIAD1  | -0.12263  | 7.7197585 | -3.728317 | 0.0003127 | 0.0090599 | 0.1153125 |
| GPCPD1  | 0.2215788 | 8.0957385 | 3.7204415 | 0.0003214 | 0.0092612 | 0.0903963 |
| RBM14   | -0.153513 | 9.4333724 | -3.704336 | 0.00034   | 0.0097426 | 0.0395632 |
| CBLB    | -0.209946 | 8.7596448 | -3.701323 | 0.0003436 | 0.0097914 | 0.0300715 |
| CUTA    | -0.222105 | 10.409454 | -3.695169 | 0.0003511 | 0.0099488 | 0.0107051 |
| LINGO2  | -0.104924 | 6.7871104 | -3.692124 | 0.0003548 | 0.01      | 0.0011335 |
| NSUN4   | -0.100191 | 7.8552361 | -3.684091 | 0.0003648 | 0.0102276 | -0.024097 |
| EAF2    | 0.1978169 | 7.2907177 | 3.6741383 | 0.0003777 | 0.0104213 | -0.055295 |
| RPL10   | -0.165347 | 14.495174 | -3.673514 | 0.0003785 | 0.0104213 | -0.05725  |
| SCAF4   | -0.162389 | 7.888604  | -3.673402 | 0.0003786 | 0.0104213 | -0.057601 |
| SAE1    | -0.167555 | 10.320141 | -3.672516 | 0.0003798 | 0.0104213 | -0.060373 |
| GMFG    | 0.2034146 | 11.958098 | 3.6668851 | 0.0003873 | 0.0105707 | -0.077991 |
| LPGAT1  | 0.16962   | 7.7427607 | 3.6629093 | 0.0003926 | 0.0106053 | -0.090417 |
| ZNF615  | -0.095142 | 7.6301987 | -3.662464 | 0.0003933 | 0.0106053 | -0.09181  |
| TREML1  | 0.2660799 | 7.5993197 | 3.6614124 | 0.0003947 | 0.0106053 | -0.095093 |
| SVIL    | 0.2328273 | 9.7463901 | 3.656389  | 0.0004016 | 0.0107355 | -0.110774 |
| SCYL2   | 0.1445678 | 8.4631737 | 3.6436539 | 0.0004196 | 0.0111212 | -0.150454 |
| TUBB    | -0.15739  | 10.023047 | -3.64319  | 0.0004203 | 0.0111212 | -0.151897 |
| ELP4    | -0.075906 | 7.1833888 | -3.640234 | 0.0004246 | 0.011178  | -0.161092 |
| ADCK2   | -0.128604 | 8.1231081 | -3.636409 | 0.0004303 | 0.0112691 | -0.172982 |
| C6orf62 | 0.1987094 | 10.536988 | 3.6311225 | 0.0004381 | 0.0114183 | -0.189396 |
| EIF4A3  | -0.145948 | 9.96457   | -3.628966 | 0.0004414 | 0.0114457 | -0.196086 |
| AIFM1   | -0.104675 | 7.7258733 | -3.62734  | 0.0004439 | 0.0114527 | -0.201131 |
| TIGD5   | -0.115851 | 7.5535397 | -3.621972 | 0.0004521 | 0.0116081 | -0.217765 |
| CAVIN2  | 0.4097761 | 9.8697375 | 3.6159837 | 0.0004615 | 0.0117907 | -0.236303 |

|           |           |           |           |           |           |           |
|-----------|-----------|-----------|-----------|-----------|-----------|-----------|
| ODF2      | -0.09319  | 7.5643336 | -3.614138 | 0.0004645 | 0.0118075 | -0.242012 |
| CA5B      | -0.18086  | 7.8912906 | -3.606527 | 0.0004767 | 0.0120603 | -0.265529 |
| DOK3      | 0.1499199 | 7.4544724 | 3.6023846 | 0.0004835 | 0.0121629 | -0.278311 |
| ERGIC2    | 0.1819319 | 7.7664181 | 3.6012157 | 0.0004855 | 0.0121629 | -0.281916 |
| RPL18     | -0.269195 | 12.549664 | -3.594532 | 0.0004967 | 0.0123842 | -0.302513 |
| PXN       | 0.1827086 | 8.1376185 | 3.5917674 | 0.0005014 | 0.0123905 | -0.311023 |
| GOT1      | -0.122901 | 7.9593085 | -3.591581 | 0.0005017 | 0.0123905 | -0.311598 |
| RNF149    | 0.2509733 | 12.383442 | 3.5831377 | 0.0005164 | 0.0126422 | -0.337557 |
| ALCAM     | 0.1672868 | 7.7130316 | 3.5829081 | 0.0005168 | 0.0126422 | -0.338262 |
| SEC31A    | -0.165596 | 8.1152891 | -3.576845 | 0.0005276 | 0.0128455 | -0.356873 |
| GPBP1     | 0.1653047 | 9.3692701 | 3.5705829 | 0.000539  | 0.0130576 | -0.376071 |
| TM9SF3    | 0.1364652 | 8.2071187 | 3.5692866 | 0.0005413 | 0.0130576 | -0.380042 |
| LAMA3     | 0.0720852 | 6.9370962 | 3.5628837 | 0.0005532 | 0.0132345 | -0.399638 |
| IRF8      | -0.228746 | 9.8365985 | -3.56236  | 0.0005542 | 0.0132345 | -0.401241 |
| ZNF428    | -0.17975  | 9.9752387 | -3.560972 | 0.0005569 | 0.0132345 | -0.405484 |
| VAMP3     | 0.1451774 | 9.933089  | 3.5593014 | 0.00056   | 0.0132345 | -0.41059  |
| HTATIP2   | 0.1795472 | 9.3009587 | 3.5585573 | 0.0005614 | 0.0132345 | -0.412864 |
| ZSCAN18   | -0.212329 | 8.7045435 | -3.554799 | 0.0005686 | 0.013251  | -0.424343 |
| HLA-DMA   | -0.241746 | 10.844563 | -3.553486 | 0.0005712 | 0.013251  | -0.428351 |
| SMG7      | 0.1691827 | 9.094336  | 3.5528306 | 0.0005724 | 0.013251  | -0.430351 |
| PTGDS     | -0.401857 | 7.9659442 | -3.551811 | 0.0005744 | 0.013251  | -0.433461 |
| TLR4      | 0.2686198 | 8.5846637 | 3.5515644 | 0.0005749 | 0.013251  | -0.434215 |
| IK        | -0.133562 | 9.3727757 | -3.546796 | 0.0005843 | 0.0133609 | -0.448755 |
| SEC61A1   | -0.170243 | 10.0282   | -3.54632  | 0.0005852 | 0.0133609 | -0.450206 |
| ANXA7     | -0.135696 | 9.7040873 | -3.544113 | 0.0005896 | 0.0133609 | -0.456929 |
| STK25     | -0.109488 | 8.2672665 | -3.54262  | 0.0005926 | 0.0133609 | -0.461476 |
| LGR6      | -0.13299  | 7.0664375 | -3.542482 | 0.0005929 | 0.0133609 | -0.461895 |
| ATP5IF1   | 0.1691406 | 8.1052805 | 3.5413537 | 0.0005951 | 0.0133609 | -0.465332 |
| MAN1C1    | -0.146238 | 7.5460413 | -3.53101  | 0.0006163 | 0.0137765 | -0.496783 |
| YWHAQ     | -0.225959 | 11.067693 | -3.528077 | 0.0006224 | 0.0138539 | -0.505689 |
| SF3A3     | -0.234849 | 9.3152043 | -3.522599 | 0.000634  | 0.0140519 | -0.522306 |
| VARS      | -0.179858 | 8.2108546 | -3.519137 | 0.0006415 | 0.014079  | -0.532797 |
| CASP4     | 0.2098298 | 11.012855 | 3.5184583 | 0.000643  | 0.014079  | -0.534852 |
| BAG3      | -0.146344 | 7.6139552 | -3.518245 | 0.0006434 | 0.014079  | -0.535497 |
| H2AFJ     | 0.2259102 | 8.8413125 | 3.5147417 | 0.000651  | 0.0141862 | -0.546104 |
| SLC9A8    | 0.181622  | 8.3770155 | 3.5114155 | 0.0006584 | 0.0142859 | -0.556166 |
| RASSF2    | 0.231996  | 12.006245 | 3.5100865 | 0.0006613 | 0.0142901 | -0.560185 |
| XPO4      | -0.12632  | 8.2031127 | -3.508028 | 0.0006659 | 0.0143296 | -0.566406 |
| NMT2      | -0.214096 | 8.0819703 | -3.504054 | 0.0006749 | 0.0144622 | -0.578409 |
| CANT1     | 0.1861428 | 9.2255727 | 3.5026732 | 0.000678  | 0.0144696 | -0.582578 |
| MYC       | -0.222673 | 8.9454936 | -3.496424 | 0.0006924 | 0.0145878 | -0.601424 |
| RRAGD     | 0.2426138 | 8.8826999 | 3.4951768 | 0.0006953 | 0.0145878 | -0.605184 |
| STOML2    | -0.125643 | 8.673907  | -3.494704 | 0.0006964 | 0.0145878 | -0.606607 |
| EXOSC1    | -0.115244 | 8.9200026 | -3.494203 | 0.0006975 | 0.0145878 | -0.608117 |
| MTURN     | 0.3338533 | 9.8827297 | 3.4941791 | 0.0006976 | 0.0145878 | -0.60819  |
| WDR54     | -0.17114  | 8.862012  | -3.489136 | 0.0007095 | 0.0147768 | -0.623373 |
| INPP5A    | 0.1493475 | 8.2437807 | 3.4836977 | 0.0007225 | 0.0149881 | -0.639727 |
| LYST      | 0.2176611 | 9.2811592 | 3.474454  | 0.0007452 | 0.0152943 | -0.667479 |
| TNFAIP8L1 | -0.202864 | 7.7386244 | -3.474161 | 0.0007459 | 0.0152943 | -0.668356 |
| ANXA2     | -0.210733 | 10.079774 | -3.474078 | 0.0007461 | 0.0152943 | -0.668606 |
| TMEM167A  | 0.1154287 | 6.8966024 | 3.4706237 | 0.0007548 | 0.0154108 | -0.678961 |

|           |           |           |           |           |           |           |
|-----------|-----------|-----------|-----------|-----------|-----------|-----------|
| TOB1      | -0.149878 | 8.0534995 | -3.467547 | 0.0007626 | 0.0154322 | -0.688177 |
| SERTAD2   | -0.160168 | 9.7592405 | -3.466734 | 0.0007646 | 0.0154322 | -0.690612 |
| ENO1      | -0.187003 | 11.897224 | -3.466688 | 0.0007648 | 0.0154322 | -0.69075  |
| ZBTB80S   | 0.1673689 | 7.3439409 | 3.4643641 | 0.0007707 | 0.0154919 | -0.697705 |
| FBX011    | 0.1283863 | 9.6088527 | 3.4615687 | 0.0007779 | 0.0155765 | -0.706067 |
| RAD17     | -0.070401 | 7.0606716 | -3.459135 | 0.0007843 | 0.0156429 | -0.713342 |
| ZNF438    | 0.1800795 | 7.7457116 | 3.4546059 | 0.0007962 | 0.0157023 | -0.726872 |
| NOL11     | -0.149838 | 8.6923476 | -3.4539   | 0.000798  | 0.0157023 | -0.72898  |
| RMND5A    | 0.1155454 | 6.9869443 | 3.4533436 | 0.0007995 | 0.0157023 | -0.73064  |
| RBM4      | -0.149344 | 9.1278431 | -3.452078 | 0.0008029 | 0.0157023 | -0.734417 |
| GLT1D1    | 0.1178994 | 7.178971  | 3.4513351 | 0.0008049 | 0.0157023 | -0.736634 |
| ST8SIA4   | 0.1762076 | 7.5271785 | 3.4511391 | 0.0008054 | 0.0157023 | -0.737219 |
| ADA2      | -0.178819 | 9.4015384 | -3.443439 | 0.0008263 | 0.0160488 | -0.760169 |
| PIK3CA    | 0.1111143 | 7.4691162 | 3.4396889 | 0.0008366 | 0.0161009 | -0.771333 |
| CKAP5     | -0.156434 | 7.8530589 | -3.43866  | 0.0008395 | 0.0161009 | -0.774393 |
| NLRP12    | 0.2776388 | 10.181142 | 3.4382283 | 0.0008407 | 0.0161009 | -0.775679 |
| RBP7      | 0.2895652 | 8.7870294 | 3.4354097 | 0.0008486 | 0.0161009 | -0.78406  |
| KLHDC8B   | 0.2100445 | 8.075406  | 3.4352642 | 0.000849  | 0.0161009 | -0.784492 |
| RALB      | 0.2198841 | 11.225962 | 3.4352442 | 0.000849  | 0.0161009 | -0.784552 |
| P4HA1     | 0.1108287 | 7.7148766 | 3.4333335 | 0.0008544 | 0.0161009 | -0.79023  |
| GAR1      | -0.111371 | 7.8786483 | -3.433151 | 0.0008549 | 0.0161009 | -0.790774 |
| KHSRP     | -0.129844 | 7.7265662 | -3.432463 | 0.0008569 | 0.0161009 | -0.792816 |
| LEMD2     | -0.099294 | 8.1345207 | -3.428076 | 0.0008694 | 0.0162206 | -0.805842 |
| BASP1     | 0.3132579 | 13.088006 | 3.4280464 | 0.0008695 | 0.0162206 | -0.805929 |
| SIGLEC17P | -0.100248 | 7.0574131 | -3.423264 | 0.0008834 | 0.0164201 | -0.820113 |
| OSBPL11   | 0.1443148 | 7.8217327 | 3.4193869 | 0.0008948 | 0.0165594 | -0.831601 |
| SRSF10    | -0.148506 | 8.3599236 | -3.418508 | 0.0008974 | 0.0165594 | -0.834204 |
| YOD1      | 0.4019251 | 8.5015108 | 3.4174719 | 0.0009005 | 0.0165594 | -0.837271 |
| PARP1     | -0.216737 | 9.8250405 | -3.414329 | 0.0009098 | 0.016673  | -0.846573 |
| NGRN      | -0.154538 | 9.8747162 | -3.412028 | 0.0009168 | 0.0167344 | -0.853376 |
| ZDHHC17   | 0.1855398 | 8.1722846 | 3.4110811 | 0.0009196 | 0.0167344 | -0.856176 |
| MUTYH     | -0.118377 | 7.9488802 | -3.407916 | 0.0009293 | 0.0167769 | -0.865528 |
| ETS1      | -0.2727   | 11.574677 | -3.407823 | 0.0009296 | 0.0167769 | -0.865802 |
| ZFP90     | -0.160282 | 8.55989   | -3.407091 | 0.0009318 | 0.0167769 | -0.867965 |
| PLD3      | -0.159253 | 8.7831149 | -3.40533  | 0.0009373 | 0.0167769 | -0.873165 |
| POLA2     | -0.111456 | 7.5526782 | -3.404113 | 0.000941  | 0.0167769 | -0.876758 |
| TGFBRAP1  | -0.173856 | 7.3225681 | -3.403991 | 0.0009414 | 0.0167769 | -0.877118 |
| FRYL      | -0.091571 | 7.7193487 | -3.39651  | 0.0009649 | 0.0171362 | -0.899176 |
| OPN3      | -0.121639 | 7.3350823 | -3.391322 | 0.0009815 | 0.0173623 | -0.914449 |
| GPR68     | -0.151416 | 7.4589297 | -3.390433 | 0.0009843 | 0.0173623 | -0.917064 |
| BOP1      | -0.167116 | 8.4601396 | -3.389411 | 0.0009876 | 0.0173623 | -0.92007  |
| CR1       | 0.1854351 | 7.6179691 | 3.3878919 | 0.0009926 | 0.0173902 | -0.924537 |
| PRMT1     | -0.164998 | 9.1794255 | -3.380905 | 0.0010156 | 0.0177335 | -0.945061 |
| POC1B     | 0.1885553 | 8.0513483 | 3.3777982 | 0.001026  | 0.0177623 | -0.954178 |
| RFC5      | -0.086953 | 7.6730763 | -3.377565 | 0.0010268 | 0.0177623 | -0.954861 |
| PCBP1     | -0.12635  | 12.414814 | -3.377343 | 0.0010275 | 0.0177623 | -0.955512 |
| LETM1     | -0.106895 | 7.3373732 | -3.376024 | 0.001032  | 0.01778   | -0.959381 |
| FKBP3     | 0.1628824 | 7.506592  | 3.3731578 | 0.0010417 | 0.0178882 | -0.967781 |
| ACOT2     | -0.088626 | 7.1327903 | -3.370787 | 0.0010498 | 0.017968  | -0.974724 |
| CEACAM1   | 0.3036127 | 8.7670926 | 3.3694263 | 0.0010545 | 0.0179889 | -0.978709 |
| CIRBP     | -0.16299  | 10.597153 | -3.365939 | 0.0010666 | 0.0181024 | -0.988912 |

|            |           |           |           |           |           |           |
|------------|-----------|-----------|-----------|-----------|-----------|-----------|
| PHB        | -0.104247 | 8.1069254 | -3.365497 | 0.0010681 | 0.0181024 | -0.990205 |
| C12orf65   | -0.123918 | 7.560643  | -3.359834 | 0.0010881 | 0.0183803 | -1.006757 |
| TPI1       | -0.129952 | 10.801112 | -3.353102 | 0.0011122 | 0.0187275 | -1.026402 |
| EXOSC2     | -0.107685 | 7.4323369 | -3.349289 | 0.0011261 | 0.0188587 | -1.037515 |
| TNIP1      | 0.1966306 | 10.044793 | 3.3489731 | 0.0011273 | 0.0188587 | -1.038436 |
| PRIM2      | -0.105773 | 6.9896421 | -3.346315 | 0.0011371 | 0.0188769 | -1.046176 |
| FN3KRP     | -0.188297 | 8.5958717 | -3.345812 | 0.001139  | 0.0188769 | -1.047641 |
| BATF2      | 0.1888018 | 7.0610618 | 3.3457197 | 0.0011393 | 0.0188769 | -1.047909 |
| DRAM1      | 0.1679883 | 7.9704299 | 3.3441055 | 0.0011453 | 0.0189159 | -1.052607 |
| CREG1      | 0.2777914 | 9.1645676 | 3.3418457 | 0.0011538 | 0.0189745 | -1.059181 |
| PDCD10     | 0.2874867 | 8.0834952 | 3.3412027 | 0.0011562 | 0.0189745 | -1.061051 |
| NUP214     | 0.2055761 | 10.82673  | 3.3348222 | 0.0011804 | 0.0192975 | -1.079589 |
| MCM7       | -0.184979 | 9.692216  | -3.334068 | 0.0011833 | 0.0192975 | -1.081779 |
| WBP1L      | 0.1051216 | 8.1459486 | 3.3194827 | 0.0012406 | 0.0201687 | -1.124041 |
| HMGB2      | 0.2555555 | 8.4315779 | 3.3177587 | 0.0012476 | 0.0202016 | -1.129027 |
| FAM206A    | 0.1106132 | 7.6681099 | 3.3170484 | 0.0012504 | 0.0202016 | -1.131081 |
| DDHD2      | -0.106644 | 8.2317492 | -3.314914 | 0.0012591 | 0.0202785 | -1.13725  |
| RPS14      | -0.184197 | 12.928319 | -3.313726 | 0.0012639 | 0.0202935 | -1.140682 |
| MRM3       | -0.116726 | 8.0922394 | -3.312698 | 0.0012682 | 0.0202983 | -1.143651 |
| HIRIP3     | -0.127574 | 7.6031754 | -3.310577 | 0.0012769 | 0.0203665 | -1.149774 |
| RPL26L1    | 0.1974793 | 7.9507292 | 3.3097564 | 0.0012803 | 0.0203665 | -1.152142 |
| ADGRG1     | -0.291113 | 8.6807074 | -3.308203 | 0.0012867 | 0.0204064 | -1.156625 |
| TCEAL9     | 0.1130255 | 7.0707323 | 3.3035326 | 0.0013063 | 0.0205754 | -1.170089 |
| PPM1B      | 0.1886386 | 9.6912766 | 3.3028193 | 0.0013093 | 0.0205754 | -1.172144 |
| NAT10      | -0.162218 | 8.3041393 | -3.302819 | 0.0013093 | 0.0205754 | -1.172146 |
| STX3       | 0.2555874 | 9.5658263 | 3.3004964 | 0.0013191 | 0.0206675 | -1.178834 |
| RPLP0      | -0.263716 | 12.729176 | -3.299455 | 0.0013236 | 0.0206746 | -1.181834 |
| PPM1M      | 0.1261156 | 10.006705 | 3.294921  | 0.001343  | 0.020916  | -1.194876 |
| LCMT1      | -0.103408 | 8.4083178 | -3.286324 | 0.0013807 | 0.0214385 | -1.219572 |
| LOC1005067 | -0.062983 | 6.7006982 | -3.281298 | 0.0014032 | 0.0216466 | -1.233983 |
| ATP5PB     | -0.163336 | 9.9131779 | -3.280094 | 0.0014086 | 0.0216466 | -1.237432 |
| MRPS26     | -0.11944  | 7.9153132 | -3.279254 | 0.0014125 | 0.0216466 | -1.239839 |
| WDR4       | -0.117109 | 7.9840629 | -3.279004 | 0.0014136 | 0.0216466 | -1.240554 |
| BCL11B     | -0.244997 | 9.4239703 | -3.278693 | 0.001415  | 0.0216466 | -1.241445 |
| STK3       | 0.1516746 | 7.6716242 | 3.2758435 | 0.001428  | 0.0217812 | -1.249604 |
| ANXA3      | 0.4100395 | 8.181667  | 3.2738197 | 0.0014373 | 0.0218588 | -1.255394 |
| RANBP3     | -0.092469 | 8.0818481 | -3.269122 | 0.0014591 | 0.0221256 | -1.268824 |
| WDR6       | -0.178496 | 9.7106519 | -3.26489  | 0.001479  | 0.0223184 | -1.280911 |
| LPAR1      | 0.1494054 | 7.2861083 | 3.2641502 | 0.0014825 | 0.0223184 | -1.283021 |
| ARHGAP11A  | 0.1049161 | 7.114529  | 3.2631955 | 0.0014871 | 0.0223184 | -1.285745 |
| YWHAZ      | -0.146319 | 10.315609 | -3.262782 | 0.001489  | 0.0223184 | -1.286926 |
| MCRS1      | -0.104482 | 8.5772232 | -3.260648 | 0.0014992 | 0.0223845 | -1.293011 |
| KLHL22     | -0.174398 | 8.9069086 | -3.260056 | 0.0015021 | 0.0223845 | -1.294698 |
| KPNA4      | 0.1763179 | 9.2509127 | 3.2577357 | 0.0015133 | 0.0224283 | -1.301312 |
| GPR63      | 0.0605756 | 6.6906522 | 3.2576524 | 0.0015137 | 0.0224283 | -1.301549 |
| KLHL2      | 0.2368151 | 7.9608977 | 3.2553459 | 0.0015249 | 0.0224473 | -1.308119 |
| AGO4       | 0.14754   | 7.7550248 | 3.2544957 | 0.001529  | 0.0224473 | -1.310539 |
| NBEAL2     | 0.2258868 | 9.5882305 | 3.2534887 | 0.0015339 | 0.0224473 | -1.313406 |
| SCMH1      | -0.070837 | 7.4176819 | -3.252945 | 0.0015366 | 0.0224473 | -1.314954 |
| GFM2       | -0.066971 | 6.8868553 | -3.25257  | 0.0015385 | 0.0224473 | -1.316019 |
| COX10      | -0.111305 | 8.0955334 | -3.249823 | 0.001552  | 0.0224473 | -1.323835 |

|          |           |           |           |           |           |           |
|----------|-----------|-----------|-----------|-----------|-----------|-----------|
| UBE2D4   | -0.080825 | 7.5559236 | -3.249524 | 0.0015535 | 0.0224473 | -1.324684 |
| YIF1A    | -0.111646 | 7.9325416 | -3.249521 | 0.0015535 | 0.0224473 | -1.324694 |
| CCT7     | -0.141031 | 9.7012064 | -3.249059 | 0.0015558 | 0.0224473 | -1.326007 |
| DGCR2    | 0.1418774 | 8.73816   | 3.2485669 | 0.0015582 | 0.0224473 | -1.327406 |
| EPHX2    | -0.156951 | 7.6384401 | -3.247354 | 0.0015643 | 0.0224719 | -1.330852 |
| TXN      | 0.2579551 | 10.942106 | 3.2438526 | 0.0015818 | 0.0226614 | -1.340799 |
| TRIM68   | -0.092198 | 7.8099285 | -3.238908 | 0.001607  | 0.0229578 | -1.35483  |
| MGEA5    | 0.1616583 | 11.238164 | 3.2378734 | 0.0016123 | 0.0229702 | -1.357764 |
| HNRNPUL1 | -0.145851 | 10.352448 | -3.229322 | 0.0016567 | 0.0235389 | -1.381983 |
| ATP1B1   | -0.071346 | 6.9451354 | -3.224982 | 0.0016797 | 0.0238004 | -1.394253 |
| NIP7     | -0.140419 | 8.1297615 | -3.223675 | 0.0016867 | 0.0238342 | -1.397945 |
| TMCC3    | 0.1528084 | 7.4016131 | 3.2218884 | 0.0016963 | 0.0239046 | -1.402993 |
| CHUK     | 0.1228739 | 8.2100952 | 3.2195319 | 0.001709  | 0.0240187 | -1.409645 |
| CDYL     | -0.067086 | 7.0375922 | -3.210513 | 0.0017585 | 0.0245595 | -1.435068 |
| GATD3A   | -0.106544 | 8.8710234 | -3.210026 | 0.0017613 | 0.0245595 | -1.436439 |
| IFIT5    | 0.1971449 | 7.3608734 | 3.2099465 | 0.0017617 | 0.0245595 | -1.436663 |
| NRGN     | 0.4824445 | 10.678406 | 3.2089677 | 0.0017672 | 0.0245697 | -1.439418 |
| UBL5     | 0.1771485 | 8.5882047 | 3.2067977 | 0.0017793 | 0.0246727 | -1.445524 |
| REV1     | -0.094678 | 7.7567088 | -3.204493 | 0.0017923 | 0.0247869 | -1.452005 |
| PTBP1    | -0.141782 | 11.331104 | -3.201219 | 0.001811  | 0.0249781 | -1.461206 |
| RNF220   | -0.131764 | 8.4995409 | -3.199607 | 0.0018202 | 0.025039  | -1.465734 |
| RCE1     | -0.086233 | 7.8023866 | -3.198022 | 0.0018294 | 0.025098  | -1.470182 |
| F5       | 0.2742793 | 8.1515872 | 3.192754  | 0.00186   | 0.0254512 | -1.484959 |
| PTPRC    | -0.275895 | 8.5495553 | -3.187573 | 0.0018906 | 0.0257418 | -1.499472 |
| CSF1R    | -0.237038 | 10.715616 | -3.187481 | 0.0018912 | 0.0257418 | -1.499729 |
| NSDHL    | -0.093247 | 7.539515  | -3.184738 | 0.0019076 | 0.0258972 | -1.507405 |
| RIOK1    | -0.071966 | 7.3634107 | -3.181349 | 0.001928  | 0.0260718 | -1.516882 |
| MDH1     | -0.159902 | 10.270991 | -3.180941 | 0.0019305 | 0.0260718 | -1.518019 |
| GFM1     | -0.112364 | 7.8759063 | -3.177102 | 0.0019539 | 0.0263199 | -1.528743 |
| TLK2     | 0.0847723 | 8.2459238 | 3.1740571 | 0.0019727 | 0.0263716 | -1.537241 |
| XXYL1    | -0.096717 | 7.5896648 | -3.173808 | 0.0019743 | 0.0263716 | -1.537934 |
| SLC22A4  | 0.2555421 | 8.2725311 | 3.1733314 | 0.0019772 | 0.0263716 | -1.539265 |
| PNPO     | -0.119624 | 8.627881  | -3.17291  | 0.0019798 | 0.0263716 | -1.540441 |
| GPATCH1  | -0.069399 | 7.2652856 | -3.172369 | 0.0019832 | 0.0263716 | -1.54195  |
| ARMCX6   | -0.095906 | 7.952643  | -3.170621 | 0.0019941 | 0.0264488 | -1.546821 |
| ZMYND8   | -0.085542 | 7.403847  | -3.163686 | 0.002038  | 0.0269613 | -1.566134 |
| PTGDR    | -0.154251 | 7.480949  | -3.162345 | 0.0020465 | 0.0270059 | -1.569864 |
| PRPS1    | -0.142777 | 8.7367571 | -3.160065 | 0.0020612 | 0.0270618 | -1.576203 |
| SYPL1    | -0.127353 | 8.3695159 | -3.160063 | 0.0020612 | 0.0270618 | -1.576208 |
| MME      | 0.3752038 | 10.822752 | 3.1580341 | 0.0020743 | 0.0271655 | -1.581846 |
| GTPBP3   | -0.087037 | 7.5934529 | -3.155415 | 0.0020914 | 0.02732   | -1.589119 |
| SLC25A22 | -0.119252 | 7.3571954 | -3.151127 | 0.0021196 | 0.027606  | -1.601017 |
| ZNF362   | -0.104928 | 8.3377637 | -3.150475 | 0.002124  | 0.027606  | -1.602824 |
| ITFG2    | -0.130986 | 8.3200169 | -3.145973 | 0.002154  | 0.0279269 | -1.615299 |
| UBE2A    | 0.1300064 | 8.313559  | 3.1441022 | 0.0021666 | 0.0280204 | -1.62048  |
| PTPN12   | 0.2157371 | 8.973169  | 3.1391946 | 0.0022    | 0.0283121 | -1.634055 |
| ECH1     | -0.148798 | 10.130053 | -3.138582 | 0.0022042 | 0.0283121 | -1.635748 |
| WBP11    | -0.139135 | 8.4489254 | -3.138389 | 0.0022056 | 0.0283121 | -1.636281 |
| ATP5MF   | 0.1310171 | 8.7224724 | 3.1370722 | 0.0022146 | 0.0283583 | -1.639921 |
| GOSR2    | -0.084709 | 7.4397267 | -3.135353 | 0.0022265 | 0.0284197 | -1.644671 |
| PJA2     | 0.3026412 | 10.924851 | 3.1344203 | 0.002233  | 0.0284197 | -1.647246 |



|           |           |           |           |           |           |           |
|-----------|-----------|-----------|-----------|-----------|-----------|-----------|
| MAP2K1    | -0.130138 | 9.0987415 | -3.134008 | 0.0022359 | 0.0284197 | -1.648383 |
| FNDC3A    | 0.0970673 | 7.4470377 | 3.1319918 | 0.0022499 | 0.0285287 | -1.653949 |
| DDA1      | -0.121505 | 9.0847465 | -3.129198 | 0.0022696 | 0.0286959 | -1.661655 |
| NCKAP1L   | -0.143134 | 8.9824445 | -3.128544 | 0.0022742 | 0.0286959 | -1.663457 |
| RIT1      | 0.1420491 | 7.8205001 | 3.1268617 | 0.0022861 | 0.0287668 | -1.668094 |
| CMTM6     | 0.2186132 | 10.455927 | 3.1261887 | 0.0022909 | 0.0287668 | -1.669949 |
| RAB18     | 0.1081574 | 7.1858    | 3.122676  | 0.0023161 | 0.0289321 | -1.679622 |
| BCL3      | 0.2273496 | 9.2352672 | 3.1221061 | 0.0023202 | 0.0289321 | -1.681191 |
| RNF216P1  | -0.06004  | 7.2266316 | -3.122014 | 0.0023208 | 0.0289321 | -1.681444 |
| NP1PB9    | -0.116688 | 8.1209666 | -3.117969 | 0.0023501 | 0.0292273 | -1.692569 |
| PCSK7     | -0.114377 | 9.2172693 | -3.113498 | 0.0023829 | 0.0295644 | -1.704855 |
| GPR174    | -0.052693 | 6.7407628 | -3.112694 | 0.0023889 | 0.0295674 | -1.707061 |
| ENOPH1    | -0.155587 | 8.1203914 | -3.11129  | 0.0023993 | 0.0296256 | -1.710917 |
| NUP188    | -0.105303 | 7.3533739 | -3.110491 | 0.0024052 | 0.0296284 | -1.713106 |
| HSPA9     | -0.14083  | 9.1418558 | -3.104346 | 0.0024514 | 0.0300883 | -1.729953 |
| MSTO1     | -0.087072 | 7.2638089 | -3.103983 | 0.0024542 | 0.0300883 | -1.730949 |
| DHRX      | 0.1034373 | 7.2652604 | 3.1026466 | 0.0024643 | 0.0301416 | -1.734608 |
| TSTA3     | 0.2749523 | 8.1359997 | 3.1015236 | 0.0024729 | 0.0301752 | -1.737682 |
| RNF4      | -0.122762 | 8.3839909 | -3.098898 | 0.002493  | 0.0303496 | -1.744866 |
| ARPC4     | 0.1659221 | 10.498574 | 3.0928874 | 0.0025397 | 0.030756  | -1.761294 |
| CYFIP2    | -0.205952 | 11.371667 | -3.092877 | 0.0025398 | 0.030756  | -1.761321 |
| DNAJC3    | 0.0951018 | 7.1367913 | 3.0913224 | 0.002552  | 0.030756  | -1.765567 |
| CPD       | 0.2043009 | 9.0173834 | 3.0912227 | 0.0025528 | 0.030756  | -1.765839 |
| CDA       | 0.3042416 | 9.750828  | 3.0895251 | 0.0025662 | 0.030756  | -1.770472 |
| TGIF1     | -0.093952 | 7.6602575 | -3.089133 | 0.0025693 | 0.030756  | -1.771542 |
| WDR33     | -0.102887 | 8.8712451 | -3.089015 | 0.0025702 | 0.030756  | -1.771862 |
| FLOT1     | 0.2214943 | 9.7011482 | 3.0885568 | 0.0025739 | 0.030756  | -1.773113 |
| CBX6      | -0.13755  | 8.9919968 | -3.086886 | 0.0025872 | 0.0308437 | -1.777671 |
| RPS2      | -0.117106 | 14.13216  | -3.08317  | 0.0026169 | 0.031046  | -1.787797 |
| CASP8     | -0.139729 | 7.5194029 | -3.081902 | 0.0026272 | 0.031046  | -1.79125  |
| SLC37A4   | -0.107126 | 7.9186985 | -3.081824 | 0.0026278 | 0.031046  | -1.791463 |
| PAN3      | 0.1463327 | 9.6395387 | 3.0817888 | 0.0026281 | 0.031046  | -1.791558 |
| TRAF3IP2  | -0.10591  | 8.1377723 | -3.077279 | 0.0026648 | 0.0313375 | -1.803828 |
| CYBB      | 0.2244403 | 9.3943972 | 3.0772725 | 0.0026648 | 0.0313375 | -1.803847 |
| SGSM1     | -0.075181 | 6.9640085 | -3.074728 | 0.0026858 | 0.031512  | -1.810765 |
| C16orf87  | -0.087902 | 7.112135  | -3.073389 | 0.0026968 | 0.0315705 | -1.814403 |
| KRTCAP2   | -0.16019  | 10.056077 | -3.071018 | 0.0027165 | 0.0316869 | -1.820843 |
| HNRNPA1P1 | -0.253968 | 10.886934 | -3.070723 | 0.002719  | 0.0316869 | -1.821642 |
| SH2D3C    | -0.122725 | 8.644775  | -3.067933 | 0.0027424 | 0.031798  | -1.829213 |
| ARHGAP26  | 0.146617  | 7.4850776 | 3.0675721 | 0.0027454 | 0.031798  | -1.830193 |
| KLHL12    | 0.1020494 | 8.3399691 | 3.067392  | 0.0027469 | 0.031798  | -1.830681 |
| NOP53     | -0.157103 | 13.062847 | -3.063748 | 0.0027778 | 0.0320094 | -1.84056  |
| PPP3CC    | -0.150302 | 8.2825413 | -3.062895 | 0.0027851 | 0.0320094 | -1.842872 |
| CRELD1    | -0.095902 | 7.5596423 | -3.06281  | 0.0027858 | 0.0320094 | -1.843101 |
| ASCC1     | -0.10229  | 8.3326579 | -3.061626 | 0.0027959 | 0.0320094 | -1.846307 |
| ZNF317    | -0.07289  | 7.8472181 | -3.061058 | 0.0028008 | 0.0320094 | -1.847845 |
| GAB2      | 0.2235907 | 9.3036766 | 3.0595359 | 0.0028139 | 0.0320094 | -1.851966 |
| AHSA1     | -0.10748  | 8.6538719 | -3.058609 | 0.0028218 | 0.0320094 | -1.854474 |
| NOA1      | -0.108508 | 8.8526163 | -3.058535 | 0.0028225 | 0.0320094 | -1.854674 |
| DSE       | 0.1848356 | 8.4594717 | 3.0582339 | 0.0028251 | 0.0320094 | -1.855489 |
| RBBP4     | -0.14596  | 7.7636242 | -3.058025 | 0.0028269 | 0.0320094 | -1.856055 |

|          |           |           |           |           |           |           |
|----------|-----------|-----------|-----------|-----------|-----------|-----------|
| UBAC2    | -0.124558 | 8.7217689 | -3.056559 | 0.0028396 | 0.0320368 | -1.860021 |
| MIS18BP1 | 0.1641321 | 8.972411  | 3.0549015 | 0.002854  | 0.0320368 | -1.864501 |
| NFIL3    | 0.2184997 | 8.7221572 | 3.0542462 | 0.0028598 | 0.0320368 | -1.866273 |
| ANK3     | -0.062151 | 6.8865212 | -3.054234 | 0.0028599 | 0.0320368 | -1.866305 |
| KIR2DL3  | -0.3669   | 8.5747717 | -3.054091 | 0.0028611 | 0.0320368 | -1.866692 |
| PYHIN1   | -0.208667 | 8.5891469 | -3.053491 | 0.0028664 | 0.0320368 | -1.868315 |
| PHF19    | -0.110077 | 7.9427054 | -3.051938 | 0.00288   | 0.03212   | -1.872509 |
| PELI1    | 0.2516227 | 9.2772145 | 3.048873  | 0.0029071 | 0.0323526 | -1.880784 |
| QDPR     | -0.114376 | 8.2585334 | -3.046754 | 0.002926  | 0.0324606 | -1.886501 |
| KLHL35   | 0.0799721 | 7.0114111 | 3.046201  | 0.0029309 | 0.0324606 | -1.887992 |
| RPS16    | -0.132286 | 13.892147 | -3.045679 | 0.0029356 | 0.0324606 | -1.889398 |
| WDR43    | -0.07374  | 7.1733127 | -3.043383 | 0.0029562 | 0.0325552 | -1.895589 |
| WTAP     | 0.1153251 | 8.2773479 | 3.0433311 | 0.0029567 | 0.0325552 | -1.895728 |
| THBS1    | 0.1655271 | 7.2118582 | 3.0416149 | 0.0029722 | 0.0326567 | -1.900351 |
| CALM3    | -0.158236 | 11.348182 | -3.037606 | 0.0030088 | 0.0329095 | -1.911144 |
| PANX2    | 0.2733286 | 8.8557187 | 3.0372598 | 0.0030119 | 0.0329095 | -1.912074 |
| DET1     | -0.06096  | 7.2581796 | -3.035817 | 0.0030252 | 0.0329095 | -1.915954 |
| FAIM     | -0.072093 | 6.9191971 | -3.035714 | 0.0030262 | 0.0329095 | -1.916231 |
| LONP2    | -0.112231 | 8.1824525 | -3.035438 | 0.0030287 | 0.0329095 | -1.916973 |
| ARHGEF7  | -0.085479 | 8.1003892 | -3.034939 | 0.0030333 | 0.0329095 | -1.918316 |
| MYPOP    | -0.078946 | 8.7786551 | -3.033654 | 0.0030452 | 0.0329695 | -1.921769 |
| EPHB1    | 0.1270694 | 7.4567001 | 3.0327277 | 0.0030538 | 0.0329937 | -1.924259 |
| AP4B1    | -0.122064 | 8.842794  | -3.03125  | 0.0030676 | 0.0330735 | -1.928229 |
| DHPS     | -0.091857 | 9.014308  | -3.027399 | 0.0031037 | 0.0333839 | -1.938566 |
| ZDHH14   | -0.086744 | 7.2193951 | -3.026813 | 0.0031092 | 0.0333839 | -1.940137 |
| AIM2     | 0.2598404 | 8.4666798 | 3.0255779 | 0.0031209 | 0.03339   | -1.94345  |
| ROCK2    | 0.0940241 | 11.086421 | 3.0253927 | 0.0031227 | 0.03339   | -1.943946 |
| ZNF271P  | 0.1007685 | 8.2010922 | 3.024227  | 0.0031337 | 0.0334395 | -1.947072 |
| IL37     | 0.1357262 | 7.4621249 | 3.0178126 | 0.0031953 | 0.0340268 | -1.96425  |
| MAP1LC3B | 0.133085  | 9.4494893 | 3.0163932 | 0.0032091 | 0.0340452 | -1.968048 |
| RTN3     | 0.1542254 | 8.832389  | 3.0162835 | 0.0032102 | 0.0340452 | -1.968341 |
| SERPINB1 | 0.1913017 | 10.328202 | 3.0145533 | 0.0032271 | 0.0341543 | -1.972968 |
| DKC1     | -0.117313 | 9.1516169 | -3.008638 | 0.0032854 | 0.034693  | -1.988768 |
| TCTN3    | -0.083482 | 7.3440074 | -3.007871 | 0.003293  | 0.034693  | -1.990817 |
| PPP1R3B  | 0.0894414 | 7.0043075 | 3.0073701 | 0.003298  | 0.034693  | -1.992152 |
| PDCL     | -0.076314 | 6.9335245 | -3.004268 | 0.0033291 | 0.0348982 | -2.000426 |
| RAB24    | 0.1968992 | 10.946564 | 3.004081  | 0.003331  | 0.0348982 | -2.000924 |
| KLHL36   | -0.108788 | 7.8986725 | -3.001545 | 0.0033566 | 0.0350958 | -2.007681 |
| DENND2D  | -0.17586  | 10.06022  | -2.999557 | 0.0033769 | 0.0352362 | -2.012975 |
| ZFYVE16  | 0.1149771 | 7.2713414 | 2.9961343 | 0.0034119 | 0.0355306 | -2.022083 |
| SLC6A6   | 0.1253429 | 7.4254367 | 2.9939409 | 0.0034346 | 0.0356949 | -2.027915 |
| EAF1     | 0.091422  | 7.6916424 | 2.9903423 | 0.003472  | 0.0359439 | -2.037476 |
| GPKOW    | -0.102021 | 7.88582   | -2.990308 | 0.0034724 | 0.0359439 | -2.037566 |
| NAMPT    | 0.3062305 | 11.093914 | 2.9868493 | 0.0035088 | 0.0362353 | -2.046747 |
| LSS      | -0.121175 | 7.7753079 | -2.986304 | 0.0035145 | 0.0362353 | -2.048192 |
| TTC5     | -0.122705 | 7.8125257 | -2.984543 | 0.0035332 | 0.0363557 | -2.052864 |
| RABL2A   | -0.074307 | 7.1517062 | -2.983845 | 0.0035406 | 0.03636   | -2.054712 |
| MSRB2    | 0.2135007 | 9.5656124 | 2.9825383 | 0.0035546 | 0.0363682 | -2.058177 |
| LPAR2    | 0.2518788 | 9.9947745 | 2.9824565 | 0.0035555 | 0.0363682 | -2.058393 |
| PCCA     | -0.073241 | 7.4064629 | -2.975337 | 0.0036324 | 0.0370817 | -2.077239 |
| UBE2R2   | 0.0716039 | 7.0733024 | 2.9722472 | 0.0036662 | 0.0373537 | -2.085405 |

|            |           |           |           |           |           |           |
|------------|-----------|-----------|-----------|-----------|-----------|-----------|
| PDLIM2     | -0.049584 | 6.6832061 | -2.970992 | 0.0036801 | 0.0374107 | -2.088722 |
| TCP1       | -0.176292 | 8.236565  | -2.970432 | 0.0036862 | 0.0374107 | -2.090201 |
| WDR61      | -0.126084 | 8.6407072 | -2.969187 | 0.0037    | 0.0374772 | -2.093485 |
| PDLIM7     | 0.1973735 | 8.7857704 | 2.9683461 | 0.0037094 | 0.0374987 | -2.095706 |
| ATP2A3     | -0.122106 | 8.1530333 | -2.96629  | 0.0037323 | 0.0376571 | -2.101131 |
| BRD9       | -0.11492  | 9.3815465 | -2.964226 | 0.0037555 | 0.0378171 | -2.106574 |
| RPLP1      | -0.178475 | 12.943921 | -2.962463 | 0.0037753 | 0.0378539 | -2.11122  |
| PTPN9      | -0.058347 | 6.9639506 | -2.962177 | 0.0037786 | 0.0378539 | -2.111974 |
| ALDH1A1    | -0.199896 | 8.156359  | -2.961962 | 0.003781  | 0.0378539 | -2.11254  |
| APOBEC3A   | 0.3241692 | 8.2713867 | 2.9598349 | 0.0038052 | 0.0380222 | -2.118141 |
| CSTF2      | -0.092714 | 7.7624307 | -2.95732  | 0.0038339 | 0.0382356 | -2.124759 |
| HDLBP      | 0.0515337 | 6.887029  | 2.9529313 | 0.0038845 | 0.0386662 | -2.136298 |
| ATP5MC2    | -0.140666 | 11.187387 | -2.950882 | 0.0039084 | 0.0387537 | -2.141682 |
| ZC3H15     | 0.1302417 | 7.4509596 | 2.9506088 | 0.0039115 | 0.0387537 | -2.142399 |
| CNIH4      | 0.2298242 | 9.1761738 | 2.9499219 | 0.0039196 | 0.0387537 | -2.144203 |
| NUP85      | -0.07843  | 8.495278  | -2.949296 | 0.0039269 | 0.0387537 | -2.145845 |
| VPS8       | 0.1361361 | 8.9430239 | 2.9489757 | 0.0039307 | 0.0387537 | -2.146686 |
| FRY        | 0.0847351 | 7.0457889 | 2.9465236 | 0.0039595 | 0.0389642 | -2.15312  |
| TGOLN2     | -0.165239 | 10.012408 | -2.941348 | 0.0040211 | 0.039495  | -2.166684 |
| ABLIM1     | -0.159618 | 8.8213406 | -2.93842  | 0.0040563 | 0.0397423 | -2.174349 |
| WDR18      | -0.143089 | 8.6340899 | -2.937983 | 0.0040616 | 0.0397423 | -2.175493 |
| CYB5B      | -0.121312 | 9.9621204 | -2.934382 | 0.0041053 | 0.0400948 | -2.184909 |
| STAU1      | 0.1398955 | 9.6935304 | 2.9318095 | 0.0041369 | 0.0402023 | -2.191631 |
| KMT5B      | 0.1083198 | 8.2514728 | 2.9316792 | 0.0041385 | 0.0402023 | -2.191971 |
| SLC2A14    | 0.1257252 | 7.251147  | 2.9315872 | 0.0041396 | 0.0402023 | -2.192212 |
| PLPPR2     | 0.1961575 | 8.320735  | 2.9299332 | 0.00416   | 0.0402596 | -2.19653  |
| NHS        | 0.0935806 | 7.0979133 | 2.9298492 | 0.004161  | 0.0402596 | -2.196749 |
| LCMT2      | -0.094892 | 7.4857326 | -2.928629 | 0.0041762 | 0.0403306 | -2.199934 |
| TRAPPC6B   | 0.140536  | 7.3182876 | 2.9274793 | 0.0041904 | 0.0403396 | -2.202934 |
| ANP32A-IT1 | 0.1697926 | 8.6009502 | 2.9267272 | 0.0041998 | 0.0403396 | -2.204895 |
| RTN2       | 0.1100548 | 7.3476695 | 2.9266518 | 0.0042007 | 0.0403396 | -2.205092 |
| SLC6A13    | 0.0516432 | 6.9077507 | 2.9260545 | 0.0042082 | 0.0403396 | -2.206649 |
| LAMTOR3    | 0.1939515 | 9.2560374 | 2.9236974 | 0.0042377 | 0.0405478 | -2.212793 |
| C21orf91   | 0.0656953 | 7.2138613 | 2.9221189 | 0.0042576 | 0.0406631 | -2.216905 |
| ZAP70      | -0.157181 | 8.4777744 | -2.920874 | 0.0042734 | 0.0407385 | -2.220147 |
| SKAP2      | 0.2254991 | 9.5244615 | 2.9200939 | 0.0042833 | 0.0407579 | -2.222178 |
| PCED1B     | -0.190106 | 9.8616929 | -2.917441 | 0.0043171 | 0.0408101 | -2.229082 |
| SLF2       | -0.093167 | 8.1929491 | -2.91699  | 0.0043229 | 0.0408101 | -2.230254 |
| DGAT2      | 0.1824324 | 7.9225727 | 2.9166789 | 0.0043268 | 0.0408101 | -2.231063 |
| CCAR2      | -0.10322  | 7.5996468 | -2.916164 | 0.0043334 | 0.0408101 | -2.232401 |
| PTPN23     | -0.086535 | 7.0803329 | -2.915574 | 0.004341  | 0.0408101 | -2.233936 |
| LY6H       | 0.0796384 | 7.26643   | 2.9146167 | 0.0043533 | 0.0408101 | -2.236424 |
| PTGS2      | 0.2301382 | 8.3270693 | 2.9142205 | 0.0043584 | 0.0408101 | -2.237453 |
| ACOT1      | -0.058087 | 6.9101985 | -2.913959 | 0.0043618 | 0.0408101 | -2.238134 |
| PHC2       | 0.1764448 | 8.1855514 | 2.9131884 | 0.0043718 | 0.0408101 | -2.240135 |
| MFS5       | -0.093413 | 8.6529444 | -2.912667 | 0.0043785 | 0.0408101 | -2.24149  |
| RAB20      | 0.1115132 | 7.0871825 | 2.9124862 | 0.0043809 | 0.0408101 | -2.241959 |
| MAT2B      | -0.184102 | 9.3595324 | -2.912    | 0.0043872 | 0.0408101 | -2.243222 |
| CIB1       | -0.15598  | 11.268577 | -2.911702 | 0.0043911 | 0.0408101 | -2.243996 |
| RAPH1      | -0.047952 | 6.7646126 | -2.909695 | 0.0044172 | 0.0408194 | -2.249206 |
| IL27RA     | -0.168236 | 9.3866937 | -2.909368 | 0.0044215 | 0.0408194 | -2.250055 |

|           |           |           |           |           |           |           |
|-----------|-----------|-----------|-----------|-----------|-----------|-----------|
| NFKB1     | -0.130531 | 11.270764 | -2.909337 | 0.0044219 | 0.0408194 | -2.250134 |
| RPS6KA3   | 0.139985  | 7.5867174 | 2.9092088 | 0.0044235 | 0.0408194 | -2.250467 |
| LINC01184 | -0.079406 | 7.0808347 | -2.905508 | 0.0044722 | 0.0411897 | -2.260064 |
| MED10     | -0.105757 | 8.5972844 | -2.904951 | 0.0044796 | 0.0411897 | -2.261508 |
| TBCD      | -0.126273 | 8.0204521 | -2.897456 | 0.0045797 | 0.0420364 | -2.280912 |
| LRIG1     | -0.109591 | 7.5606829 | -2.894883 | 0.0046146 | 0.0422645 | -2.287562 |
| RING1     | -0.121799 | 9.7682216 | -2.894421 | 0.0046209 | 0.0422645 | -2.288757 |
| ENDOD1    | 0.1601429 | 7.6317436 | 2.8921755 | 0.0046516 | 0.04247   | -2.294556 |
| NOP2      | -0.123109 | 8.1301026 | -2.889886 | 0.004683  | 0.0426273 | -2.300466 |
| ACAA2     | -0.10416  | 7.944466  | -2.889726 | 0.0046852 | 0.0426273 | -2.300879 |
| ALG11     | -0.061319 | 6.9891627 | -2.889106 | 0.0046938 | 0.0426302 | -2.302476 |
| TFPI      | 0.0960776 | 6.9035508 | 2.8883379 | 0.0047044 | 0.042652  | -2.304459 |
| ZMYM2     | 0.0918547 | 7.7446675 | 2.8872915 | 0.0047189 | 0.0427089 | -2.307157 |
| EIF2B5    | -0.10543  | 7.8078873 | -2.885496 | 0.0047439 | 0.0428601 | -2.311785 |
| RHEX      | 0.0885245 | 6.9257423 | 2.8825618 | 0.004785  | 0.043144  | -2.319343 |
| C3orf62   | 0.1327504 | 7.9315907 | 2.8820662 | 0.0047919 | 0.043144  | -2.320619 |
| LFNG      | -0.159154 | 11.067631 | -2.879576 | 0.0048271 | 0.0433463 | -2.327028 |
| PSMC4     | -0.170377 | 7.8724849 | -2.878882 | 0.0048369 | 0.0433463 | -2.328812 |
| TMA7      | 0.2956395 | 10.624817 | 2.8784701 | 0.0048428 | 0.0433463 | -2.329872 |
| HMGN2     | -0.12318  | 11.298814 | -2.877813 | 0.0048521 | 0.0433463 | -2.331562 |
| EIF4G1    | -0.120076 | 7.9904904 | -2.877042 | 0.0048631 | 0.0433463 | -2.333545 |
| NAGPA     | -0.096013 | 8.223327  | -2.876943 | 0.0048645 | 0.0433463 | -2.333798 |
| HSD17B7   | 0.2147744 | 12.549853 | 2.8760038 | 0.004878  | 0.0433913 | -2.336212 |
| HMGN1     | -0.181609 | 10.722208 | -2.87315  | 0.004919  | 0.0435933 | -2.343543 |
| PINK1     | 0.2151417 | 9.0312548 | 2.8727467 | 0.0049248 | 0.0435933 | -2.344577 |
| SAMD3     | -0.216377 | 8.9884525 | -2.872669 | 0.0049259 | 0.0435933 | -2.344776 |
| DDX24     | -0.165042 | 8.9786387 | -2.871061 | 0.0049492 | 0.0437246 | -2.348904 |
| EIF2B4    | -0.103913 | 9.1449011 | -2.868335 | 0.0049888 | 0.0440001 | -2.355897 |
| PLAC8     | -0.205442 | 10.749719 | -2.865699 | 0.0050275 | 0.0442655 | -2.362651 |
| KIDINS220 | 0.1545694 | 8.7309435 | 2.8638527 | 0.0050547 | 0.0443541 | -2.367381 |
| DFFA      | -0.119528 | 7.9540194 | -2.863372 | 0.0050618 | 0.0443541 | -2.368611 |
| APEX2     | -0.085263 | 8.0497913 | -2.863279 | 0.0050632 | 0.0443541 | -2.36885  |
| GLO1      | -0.145706 | 9.0411286 | -2.862269 | 0.0050782 | 0.0444103 | -2.371435 |
| USP8      | 0.085407  | 7.9338457 | 2.8608174 | 0.0050997 | 0.0444586 | -2.375149 |
| FAM46C    | 0.4924792 | 11.37646  | 2.8607445 | 0.0051008 | 0.0444586 | -2.375336 |
| RPL13A    | -0.239474 | 11.40833  | -2.857115 | 0.0051552 | 0.0448571 | -2.384616 |
| TRIM21    | 0.1721262 | 9.2378432 | 2.8532276 | 0.005214  | 0.0452929 | -2.394543 |
| GNB2      | 0.1371328 | 8.3065897 | 2.8517234 | 0.0052369 | 0.045416  | -2.398382 |
| CBX3      | 0.1749421 | 8.2638914 | 2.8501627 | 0.0052608 | 0.045506  | -2.402363 |
| ABHD5     | 0.2135804 | 9.1348153 | 2.8498986 | 0.0052649 | 0.045506  | -2.403036 |
| IRAK3     | 0.2305921 | 8.3890591 | 2.8482415 | 0.0052904 | 0.0456502 | -2.407261 |
| NRG1      | 0.1459862 | 6.9884174 | 2.8470086 | 0.0053094 | 0.0457383 | -2.410403 |
| ZBTB9     | -0.091323 | 7.7013938 | -2.845144 | 0.0053383 | 0.0459111 | -2.415151 |
| AXIN1     | -0.097466 | 8.459152  | -2.843577 | 0.0053627 | 0.0460446 | -2.41914  |
| LARP7     | 0.1472809 | 7.7190313 | 2.8420315 | 0.0053869 | 0.0461757 | -2.423073 |
| ZNF792    | -0.075112 | 7.4697688 | -2.840587 | 0.0054095 | 0.0462359 | -2.426747 |
| LIN37     | 0.0600426 | 7.1850879 | 2.8404486 | 0.0054117 | 0.0462359 | -2.427099 |
| ZW10      | -0.088772 | 7.8408232 | -2.839068 | 0.0054335 | 0.0463455 | -2.430609 |
| TRIM32    | -0.074323 | 7.2744967 | -2.836964 | 0.0054668 | 0.0465532 | -2.435955 |
| ATN1      | -0.077798 | 6.8148501 | -2.836087 | 0.0054808 | 0.0465955 | -2.438183 |
| ZNF823    | -0.065441 | 7.1938017 | -2.833801 | 0.0055173 | 0.0468291 | -2.443987 |

|          |           |           |           |           |           |           |
|----------|-----------|-----------|-----------|-----------|-----------|-----------|
| LAGE3    | -0.133336 | 9.0330749 | -2.832733 | 0.0055344 | 0.0468355 | -2.446695 |
| RUFY2    | 0.0366025 | 6.856304  | 2.8316471 | 0.0055519 | 0.0468355 | -2.44945  |
| SPON2    | -0.149293 | 7.1759091 | -2.8313   | 0.0055575 | 0.0468355 | -2.450331 |
| C2orf42  | -0.078611 | 8.2929788 | -2.831136 | 0.0055601 | 0.0468355 | -2.450747 |
| EIF3F    | -0.163955 | 11.190506 | -2.830945 | 0.0055632 | 0.0468355 | -2.45123  |
| STXBP5   | 0.1404433 | 8.1976022 | 2.8290594 | 0.0055937 | 0.0469857 | -2.456009 |
| PANK2    | 0.0922297 | 9.6452984 | 2.8281771 | 0.005608  | 0.0469857 | -2.458245 |
| IRAK4    | 0.0979497 | 7.7692849 | 2.8281655 | 0.0056082 | 0.0469857 | -2.458274 |
| RASSF1   | -0.113407 | 8.5005214 | -2.826356 | 0.0056377 | 0.0471566 | -2.462858 |
| MTMR14   | -0.117097 | 9.7176048 | -2.821906 | 0.0057108 | 0.0476206 | -2.474118 |
| KANSL2   | -0.125436 | 8.8130075 | -2.821863 | 0.0057115 | 0.0476206 | -2.474225 |
| AHDC1    | -0.092572 | 6.9879003 | -2.820651 | 0.0057316 | 0.0477112 | -2.477289 |
| SLC25A37 | 0.3171376 | 12.650214 | 2.8193035 | 0.005754  | 0.0478083 | -2.480695 |
| ZNHIT6   | -0.118794 | 7.8913845 | -2.818841 | 0.0057617 | 0.0478083 | -2.481863 |
| MATK     | -0.164404 | 8.3147558 | -2.812949 | 0.0058607 | 0.0485518 | -2.496736 |
| XPNPEP1  | -0.105492 | 9.3954725 | -2.811192 | 0.0058905 | 0.0486948 | -2.501165 |
| SERPING1 | 0.2861731 | 7.5247442 | 2.8108252 | 0.0058967 | 0.0486948 | -2.502089 |
| TTC26    | 0.0708683 | 6.9247837 | 2.8100948 | 0.0059092 | 0.04872   | -2.503929 |
| RANGAP1  | -0.166832 | 8.9935123 | -2.809311 | 0.0059225 | 0.0487528 | -2.505904 |
| TTN      | -0.056404 | 6.7901217 | -2.806648 | 0.0059682 | 0.0490289 | -2.512609 |
| SERPINB6 | -0.135295 | 10.218058 | -2.805815 | 0.0059826 | 0.0490289 | -2.514705 |
| ATP5MC1  | -0.119795 | 9.0536926 | -2.805181 | 0.0059935 | 0.0490289 | -2.5163   |
| C20orf27 | -0.1393   | 8.2858265 | -2.805159 | 0.0059939 | 0.0490289 | -2.516356 |
| ALMS1    | -0.092102 | 7.2216597 | -2.803473 | 0.0060231 | 0.0491901 | -2.520595 |
| GMDS     | -0.10083  | 8.1360907 | -2.802631 | 0.0060377 | 0.049232  | -2.522712 |
| EIF3A    | -0.111261 | 8.5772267 | -2.801996 | 0.0060488 | 0.0492448 | -2.52431  |
| TAF1     | -0.060964 | 6.9469605 | -2.798614 | 0.006108  | 0.0496487 | -2.532805 |
| HIC2     | -0.087186 | 7.5883749 | -2.797003 | 0.0061363 | 0.0497713 | -2.53685  |
| C5AR1    | 0.2663466 | 10.643631 | 2.7964594 | 0.0061459 | 0.0497713 | -2.538213 |
| EHMT2    | -0.066189 | 6.9615864 | -2.796124 | 0.0061519 | 0.0497713 | -2.539055 |
| CXCR1    | 0.2838329 | 10.07267  | 2.795584  | 0.0061614 | 0.0497713 | -2.540409 |
